# Supplementary material
Source: PubMed Central journal article supplement (PMC3511999)
Supplement: mmc1.pdf [file mmc1.pdf]

The American Journal of Human Genetics, Volume 91

## **Supplemental Data**

### **DUF1220-Domain Copy Number Implicated**

### **in Human Brain-Size Pathology and Evolution**

**Laura J. Dumas, Majesta S. O'Bleness, Jonathan M. Davis, C. Michael Dickens, Nathan Anderson, J. G. Keeney, Jay Jackson, Megan Sikela, Armin Raznahan, Jay Giedd, Judith Rapoport, Sandesh S.C. Nagamani, Ayelet Erez, Nicola Brunetti-Pierri, Rachel Sugalski, James R. Lupski, Tasha Fingerlin, Sau Wai Cheung, and James M. Sikela**

A

## ArrayCGH Analysis Flow Chart

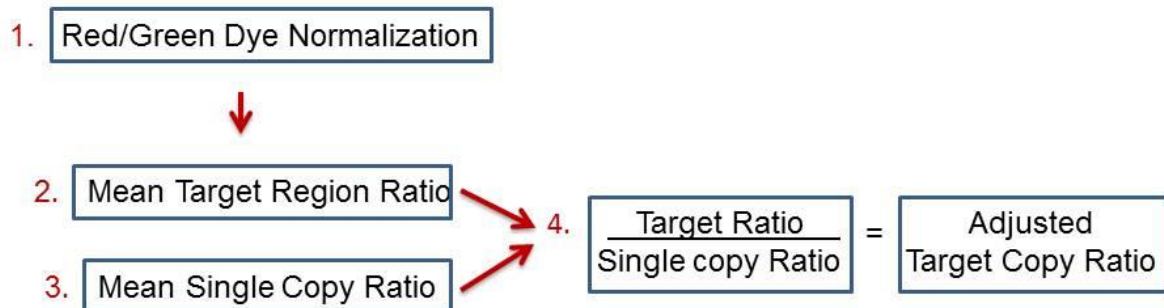

B

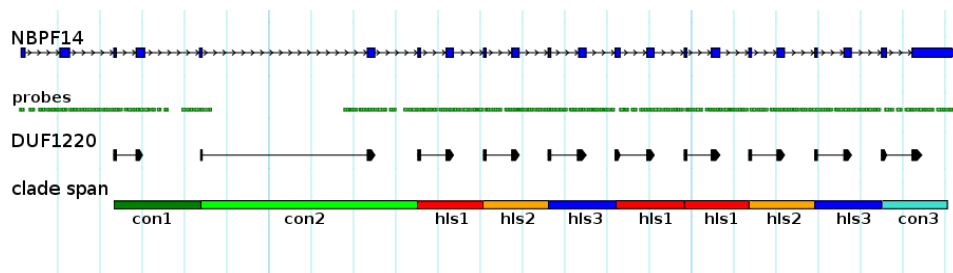

**Figure S1. Flow Chart Describing Methods Used for Array Data Processing**

(A) The array comparative genomic hybridization (aCGH) flow chart depicts the individual steps taken for the analysis of each sample tested on the custom 1q21 arrays. The following steps were applied to each array experiment (test individual/reference individual): (1) The dye normalized value for each probe on the array was calculated by the Feature Extraction software. (2) The mean test/reference ratio of all probes for a target region of interest was calculated. (3) The mean test/reference ratio of all of the single copy probes was calculated. (4) A normalized target copy ratio was calculated by dividing the target ratio calculated in step 2 by the single copy ratio calculated in step 3. A more detailed description of these procedures can be found in the Methods section.

(B) Diagram of *NBPF14* showing mapped probes, DUF1220 domains, and regions used for clade span analysis.

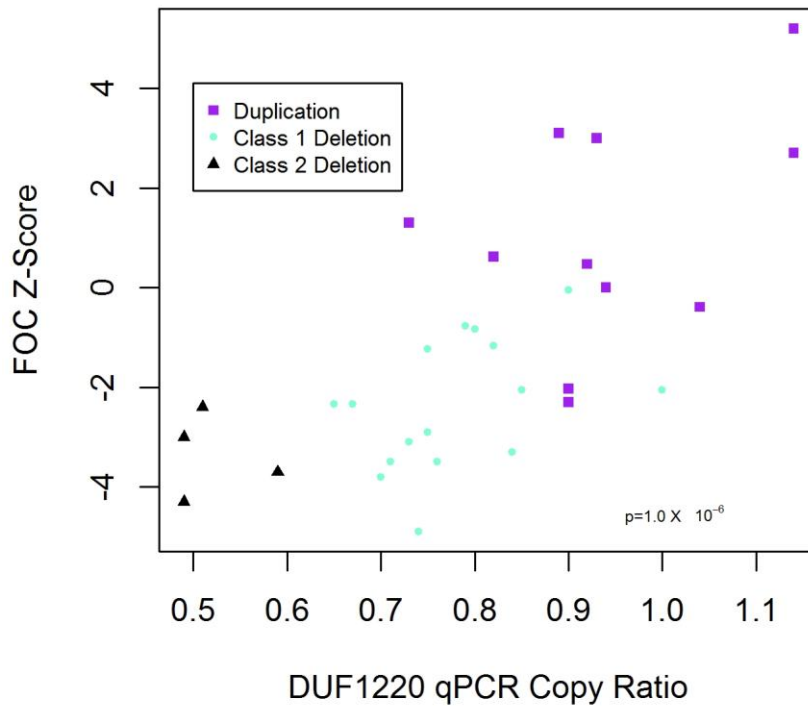

**Figure S2. Correlation between FOC Z Score and qPCR-Predicted DUF1220 HLS Copy Number within the Disease Population**

qPCR-predicted DUF1220 copy number and FOC Z scores are shown on x axis and y axis, respectively. Individuals with Class I deletions (aqua) Class II deletions (black), and duplications (purple) plotted against their FOC Z score.

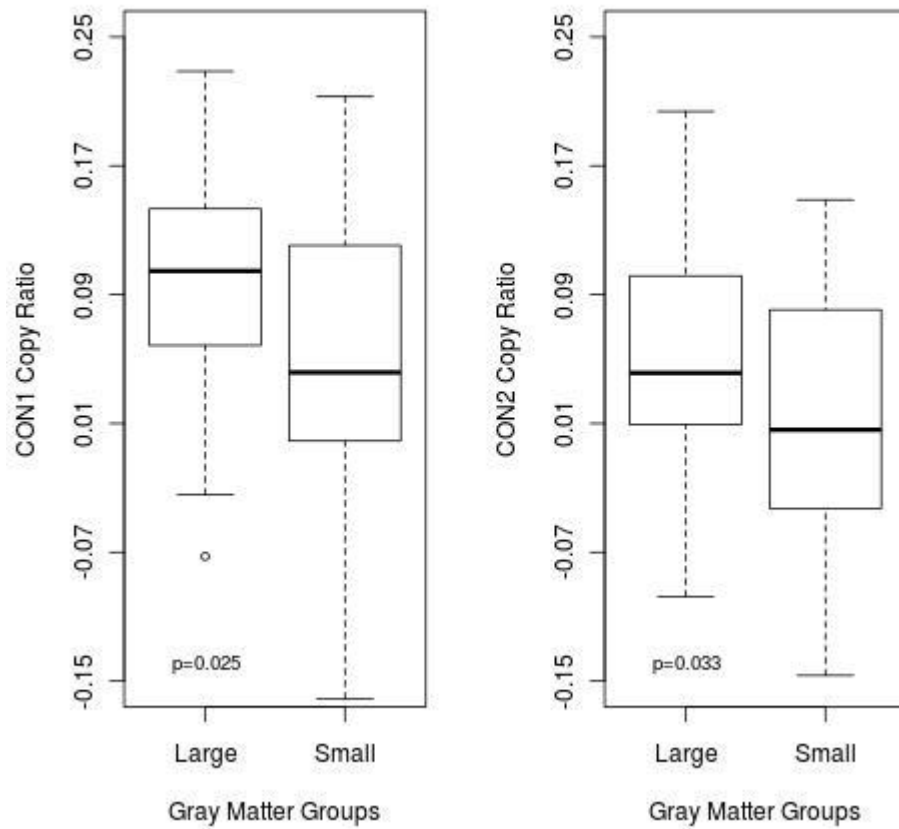

**Figure S3. CON1 and CON2 Box Plots for the Nondisease Population**

Box plots of CON1 and CON2 copy ratio in the nondisease population showing an increase in mean copy ratio in the large gray matter residual group over the small gray matter residual group. Copy ratio is defined as the relative copy number determined by aCGH in the test sample compared to the reference sample.

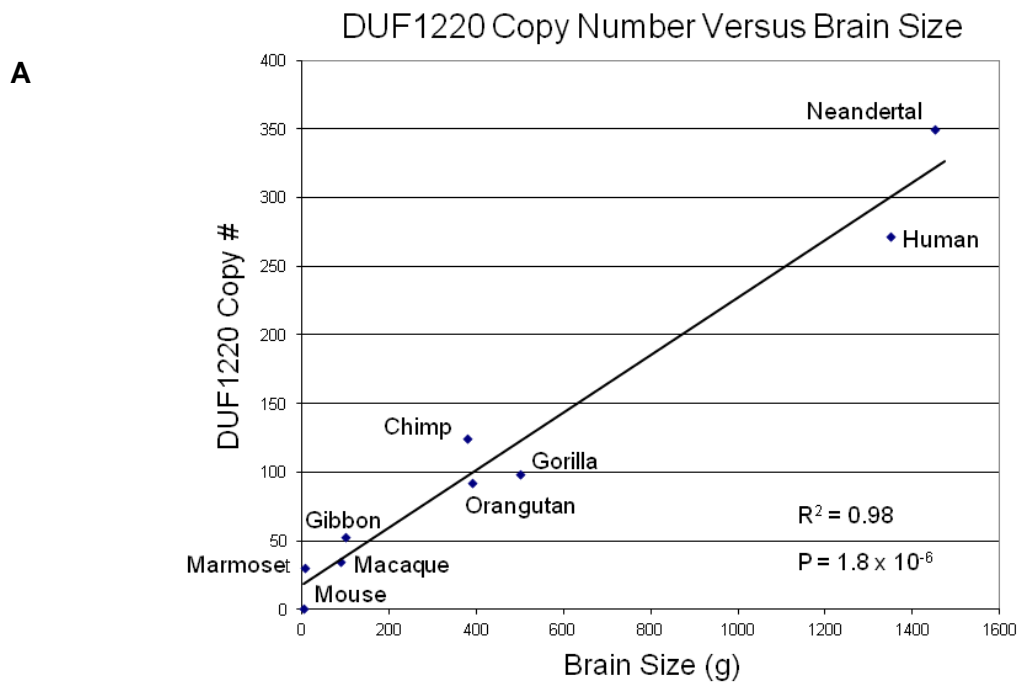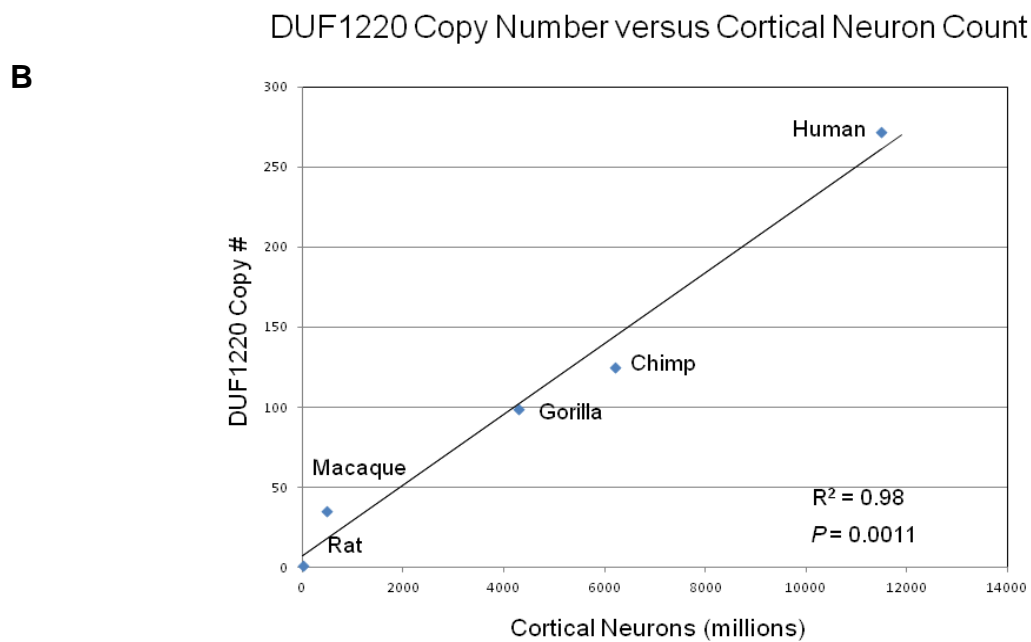

**Figure S4. DUF1220 Copy Number Compared to Primate Brain Size and Cortical Neuron Count**

(A) Graph showing correlation between brain size (g) versus DUF1220 copy number in multiple species. The DUF1220 copy number estimates were derived from the most recent genome assemblies for these species. The DUF1220 copy number for Neanderthal was estimated using read-depth coverage (Green et al. 2010).

(B) Graph showing correlation between cortical neuron counts (millions) versus DUF1220 copy number in five species.

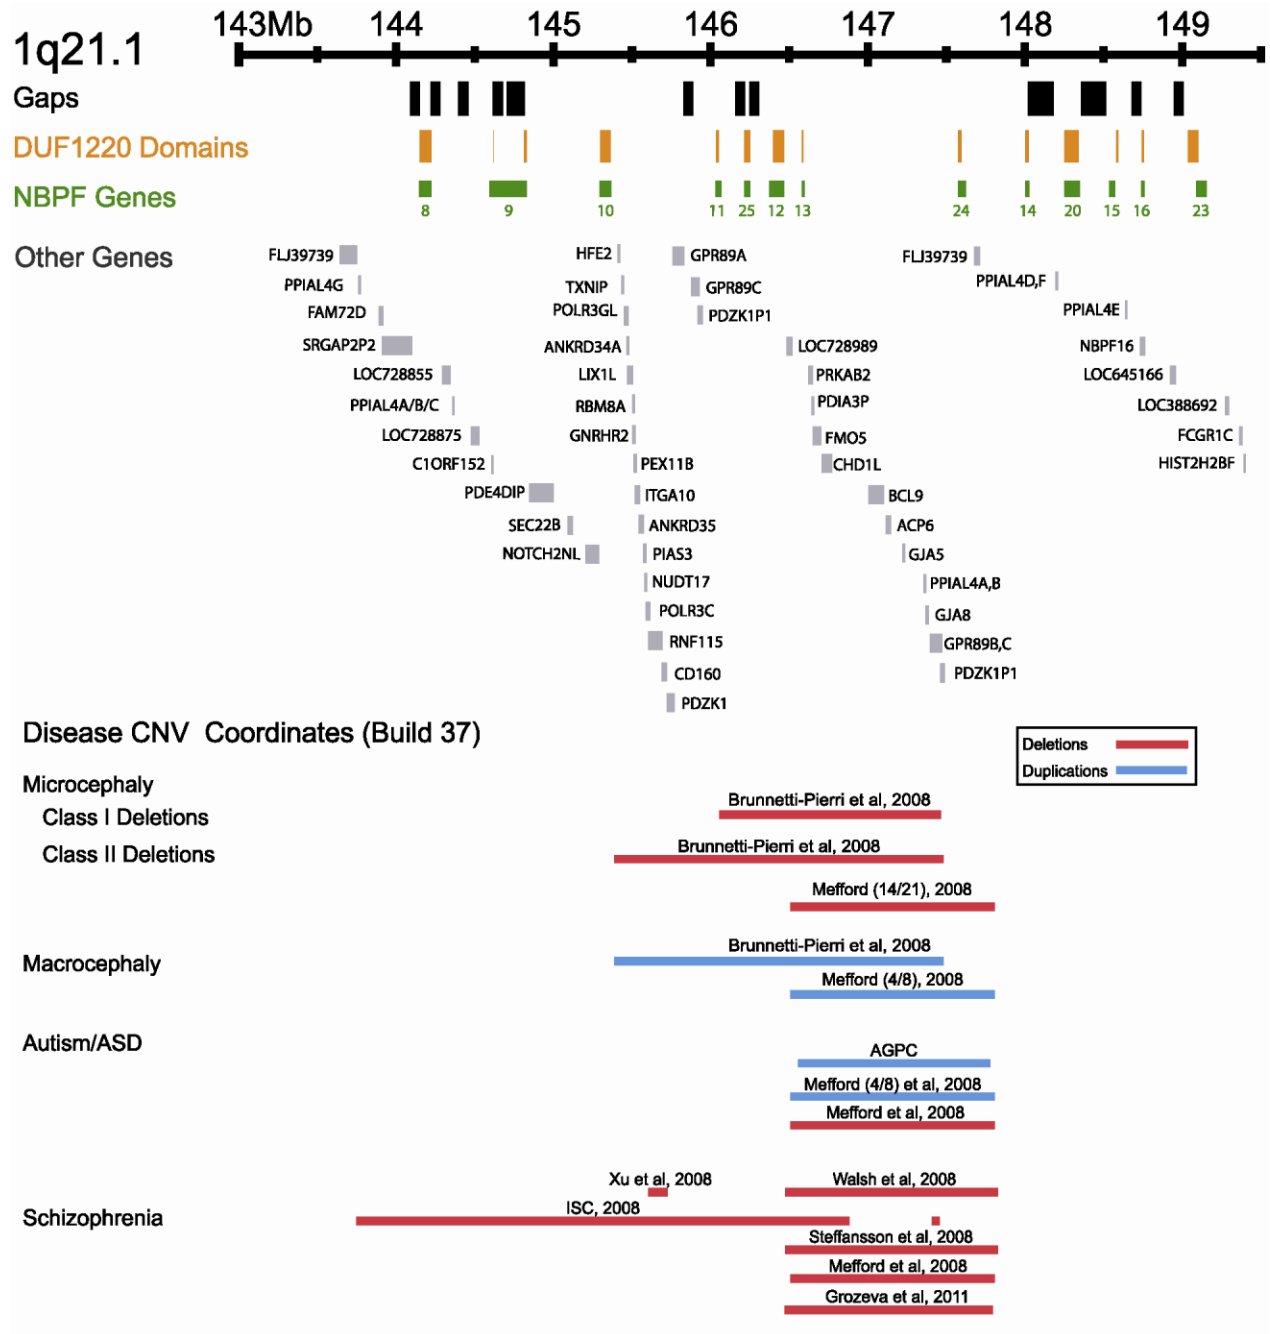

**Figure S5. 1q21.1 Genome Map Showing Placement of Disease CNVs, DUF1220 Domains, NBPF Genes, Gaps, and Other Genes in the Region**

Shown are gaps (black), DUF1220 domains (orange), NBPF genes (green), and genes other than NBPF genes (gray). Disease CNVs for microcephaly, macrocephaly, autism, and schizophrenia are shown at the bottom of the figure, with red lines representing deletions and blue lines representing duplications.

**Table S1. List of Diseases that Have Been Associated with CNVs in the 1q21.1 Region and Their References**

| <b>Disease</b>                                        | <b>References</b>                                                                                                                        |
|-------------------------------------------------------|------------------------------------------------------------------------------------------------------------------------------------------|
| Autism [MIM 612475]                                   | Autism Genome Project Consortium 2007<br>Xu et al. 2008<br>Mefford et al. 2008<br>Pinto et al. 2010                                      |
| Congenital Heart Disease [MIM 121013]                 | Christiansen et al. 2004<br>Greenway et al. 2009                                                                                         |
| Congenital Anom. of Kidney/Urinary tract [MIM 612475] | Weber et al. 2011                                                                                                                        |
| Epilepsy [MIM 600669]                                 | de Kovel et al. 2010                                                                                                                     |
| Intellectual Disability [MIM 612474; 612475]          | Mefford et al. 2008<br>Jaillard et al. 2010                                                                                              |
| Intermittent Explosive Disorder [MIM 612474]          | Vu et al. 2011                                                                                                                           |
| Macrocephaly [MIM 612475]                             | Mefford et al. 2008<br>Brunetti-Pierri et al. 2008                                                                                       |
| Mayer-Rokitansky-Kuster-Hauser Syn. [MIM 612474]      | Ledig et al. 2011                                                                                                                        |
| Microcephaly [MIM 612474]                             | Mefford et al. 2008<br>Brunetti-Pierri et al. 2008<br>Velinov and Dolzhanskaya 2010                                                      |
| Neuroblastoma [MIM 613017]                            | Vandepoele et al. 2008<br>Diskin et al. 2009                                                                                             |
| Schizophrenia [MIM 612474]                            | International Schizophrenia Consortium 2008<br>Steffansson et al. 2008<br>Ikeda et al. 2010<br>Levinson et al 2011<br>Grozeva et al 2011 |
| Thrombocytopenia-absent-radius Syn. [MIM 274000]      | Klopocki et al. 2007<br>Houejeh et al. 2011                                                                                              |

**Table S2. List of qPCR Primers and Probes**

|                           | <b>Forward Primer Sequence (5'-3')</b> | <b>Reverse Primer Sequence (5'-3')</b> | <b>Probe Sequence (5'-3')</b>                          |
|---------------------------|----------------------------------------|----------------------------------------|--------------------------------------------------------|
| <b><i>DufQ8IX62</i></b>   | GCTGGAGGTAGTA<br>GAGCCTGAAGTC          | GGAGTCAGGCTGT<br>TCAAGACAA             | [6-FAM]TGCAGGACTCACTGGATAGATGTTATTCAACTCC[TAMRA-6-FAM] |
| <b><i>Hydin</i></b>       | TGTGAGCAGCATG<br>TGGACTACA             | TCAGGAGAGATGG<br>TGAATTCTTTG           | [6-FAM]AAGACCATCTTGGACCAAGGAAGAAATATCCTC[TAMRA-6-FAM]  |
| <b><i>RP11-102F23</i></b> | CCTTCCAGGCCAG<br>CTTTG                 | CGAAGCCTTTCAG<br>ATTACTCATGA           | [6-FAM]CATGCTTCCCTTCTTTCCCTCTACCCTG[TAMRA-6-FAM]       |
| <b><i>PDE4DIP</i></b>     | GTCCGGGATGTTG<br>GTATGAATT             | CCAAGCCATTTGCT<br>CTGTTGA'             | [6-FAM]TCCTCTACTCCTGGCTCAGAAACGCCCT[TAMRA-Q]           |
| <b>Class I-specific</b>   | CGAAACCACTTGG<br>CCTTCAG               | GCTTTCAGCTTTCG<br>TAAATATTCAGTT        | [6-FAM]CCCTGCCTCGGCCAGAGGTTTC[TAMRA-6-FAM]             |
| <b>Class II-specific</b>  | TGGCTTCTTCCTG<br>CGAATTG               | TCTGCTGGGCTAC<br>ACTTCTCAA             | [6-FAM]AAGGACACCGAGGGCCACCTGG[TAMRA-6-FAM]             |



**Table S3. Phenotypic Information for Individuals in Disease Population**

| Individual | FOC Z Score | Class | Developmental Delay | Ethnicity | Phenotype                                                                                                                                                                                                               |
|------------|-------------|-------|---------------------|-----------|-------------------------------------------------------------------------------------------------------------------------------------------------------------------------------------------------------------------------|
| 10F*       | -3.5        | del1  | Yes                 | White     | Seizures, feeding difficulties, precocious puberty                                                                                                                                                                      |
| 5F*        | -3.3        | del1  | NA                  | Hispanic  | Mild DF. Failure to thrive and microcephaly                                                                                                                                                                             |
| CO16       | -2.8        | del1  | NA                  | White     | Microcephaly, Poor growth                                                                                                                                                                                               |
| CO18       | -2.2        | del1  | NA                  | Hispanic  | Failure to thrive, gastroesophageal reflux disease                                                                                                                                                                      |
| 1F(2)*     | -2.34       | del1  | No                  | White     | Intrauterine growth retardation, gastroesophageal reflux disease, 11 pairs of ribs, short stature                                                                                                                       |
| 13m*       | -0.77       | del1  | No                  | White     | Aggressive behavior, ADHD, seizure disorder                                                                                                                                                                             |
| 14M*       | -3.1        | del1  | Yes                 | White     | Clubfeet, ankyloglossia, ADHD                                                                                                                                                                                           |
| 15m*       | -1.17       | del1  | Yes                 | African   | Gastroesophageal reflux disease, inguinal hernia                                                                                                                                                                        |
| 8m*        | -2.06       | del1  | No                  | Hispanic  | Trigonocephaly                                                                                                                                                                                                          |
| 9m*        | -0.05       | del1  | Yes                 | White     | Autism spectrum behaviors, two- to three-toe syndactyly                                                                                                                                                                 |
| CO10       | -2.4        | del1  | NA                  | Hispanic  | Microcephaly                                                                                                                                                                                                            |
| CO12       | -2.1        | del1  | Yes                 | African   | Mild DD/MR                                                                                                                                                                                                              |
| CO14       | -1.1        | del1  | Yes                 | Hispanic  | Failure to thrive and MCA                                                                                                                                                                                               |
| CO15       | -3.6        | del1  | NA                  | White     | Failure to thrive                                                                                                                                                                                                       |
| CO17       | -3.1        | del1  | yes                 | White     | Moderate DD/MR, DF, short stature                                                                                                                                                                                       |
| 4(11)*     | -3.5        | del1  | Yes                 | White     | Intrauterine growth retardation, chorioretinal and iris coloboma, lens subluxation, microphthalmia, laryngomalacia VUR grade 4/5, hydronephrosis, postaxial polydactyly, short stature                                  |
| 2(4)*      | -3.8        | del1  | Yes                 | White     | Ankyloglossia, behavioral problems, hallucinations, sleep disturbance                                                                                                                                                   |
| 12(6)*     | -2.9        | del1  | Yes                 | White     | Failure to thrive, Hemangioma                                                                                                                                                                                           |
| 17m*       | -3.7        | del2  | Yes                 | White     | Gestation complicated by maternal diabetes, cleft palate, preaxial polydactyly, sensorineural hearing loss, bicuspid aortic valve, congenital cystic adenomatoid malformation of the lung, pelvic kidney, short stature |
| 18m*       | -2.05       | del2  | Yes                 | White     | Plagiocephaly, strabismus, MRI: brain asymmetry, enlargement of the lateral and III ventricles, increased subarachnoid space                                                                                            |

|         |       |      |     |             |                                                                                                |
|---------|-------|------|-----|-------------|------------------------------------------------------------------------------------------------|
| 19m*    | -2.34 | del2 | Yes | White       | Failure to thrive, frequent infections, pectus excavatum, small kidneys, hypospadias           |
| 20m*    | -3    | del2 | Yes | White       | Failure to thrive                                                                              |
| 21m*    | -2.4  | del2 | Yes | White       | Failure to thrive, speech delay, polyhydramnios, severe feeding difficulties, chronic vomiting |
| CO11    | -2.8  | del2 | Yes | White       | Mild developmental delay                                                                       |
| CO6     | -2.4  | del2 | NA  | White       | NA                                                                                             |
| 16(12)* | -4.3  | del2 | Yes | White       | NA                                                                                             |
| 29F*    | -2.03 | dup  | Yes | White       | Failure to thrive, gastroesophageal reflux disease, lower limb hypertonicity                   |
| 33F*    | 3     | dup  | Yes | White       | Esotropia, hydrocephalus, advanced bone age                                                    |
| CO31    | -0.02 | dup  | Yes | Hispanic    | NA                                                                                             |
| 34m*    | -2.3  | dup  | Yes | Hispanic    | Failure to thrive, Autism, spastic diplegia                                                    |
| CO21    | -3.2  | dup  | Yes | White       | Failure to thrive and hydrocephalus                                                            |
| CO23    | 0.9   | dup  | NA  | White       | Seizures, feeding difficulties, precocious puberty                                             |
| CO27    | -2.3  | dup  | NA  | Hispanic    | Autism, spastic diplegia,                                                                      |
| 22(13)* | 2.7   | dup  | No  | Hispanic    | Complex congenital heart defect                                                                |
| 23(14)* | 1.3   | dup  | Yes | White       | Failure to thrive, hypotonia, eczema                                                           |
| 24(17)* | 0     | dup  | Yes | East Indian | Speech delay, seizures                                                                         |
| 25(18)* | 3.1   | dup  | Yes | White       | Esotropia, VI and VII nerve paresis, hypotonia                                                 |
| 26(19)* | 0.47  | dup  | No  | Hispanic    | Lower limb hypertonicity                                                                       |
| 31(20)* | -0.39 | dup  | Yes | C-French    | Arthrogryposis, fifth-finger clinodactyly, Psoriasis, right-sided hyperpigmentation            |
| 27(21)* | 0.62  | dup  | Yes | Hispanic    | Chiari malformation, hemihypertrophy                                                           |
| 28(22)* | 5.2   | dup  | Yes | White       | Dysphagia, gastroesophageal reflux disease, lower limb hypertonicity                           |
| CO1     | 0.7   | dup  | NA  | Hispanic    | Pervasive Developmental Disorder                                                               |

The FOC Z score, aberration class, and phenotype are shown. NA=not available; \* denotes samples that were previously tested on low resolution arrays in Brunetti-Pierri et al, 2008.

**Table S4. qPCR-Based Correlations between Copy Number and FOC Z Score for Six Genes/Regions for the Entire Disease Population**

| <b>Probe</b>      | <b>Beta</b> | <b>SE</b> | <b>p Value</b>       |
|-------------------|-------------|-----------|----------------------|
| DUF1220 (HLS)     | 9.99400     | 1.99500   | $1.0 \times 10^{-6}$ |
| <i>HYDIN</i>      | 5.02200     | 2.00200   | 0.01757              |
| Class II-specific | 5.20700     | 2.00000   | 0.01403              |
| RP11-102F23       | 3.43270     | 0.68570   | $1.0 \times 10^{-5}$ |
| Class I-specific  | 6.46000     | 1.53400   | 0.00020              |
| <i>PDE4DIP</i>    | 2.76200     | 2.72400   | 0.31900              |

In the following tables, common statistical nomenclature is used as follows: beta is the difference in mean copy ratio in the case of t-tests, or the slope of the fit line in the case of a linear regression; SE is the standard error of beta, and p value is the probability of obtaining a test statistic as extreme as the one observed given the null is true.

**Table S5. Correlation of Average aCGH-Based Copy Ratio of Non-DUF1220 Genes in the 1q21.1-1q21.2 Region with FOC Z Score in the Whole Disease Population**

| Gene            | Beta          | SE            | R <sup>2</sup> | p Value                       |
|-----------------|---------------|---------------|----------------|-------------------------------|
| <b>SRGAP2</b>   | <b>5.255</b>  | <b>1.385</b>  | <b>0.265</b>   | <b>0.0005</b>                 |
| <b>PDE4DIP*</b> | <b>7.064</b>  | <b>1.673</b>  | <b>0.308</b>   | <b>0.0001</b>                 |
| <b>SEC22B</b>   | <b>5.255</b>  | <b>1.385</b>  | <b>0.265</b>   | <b>0.0049</b>                 |
| <b>NOTCH2NL</b> | <b>5.879</b>  | <b>1.292</b>  | <b>0.341</b>   | <b>4.88 × 10<sup>-5</sup></b> |
| <b>HFE2</b>     | <b>3.217</b>  | <b>1.185</b>  | <b>0.156</b>   | <b>0.0097</b>                 |
| <b>TXNIP</b>    | <b>3.048</b>  | <b>1.220</b>  | <b>0.135</b>   | <b>0.0166</b>                 |
| <b>POLR3GL</b>  | <b>3.146</b>  | <b>1.25</b>   | <b>0.136</b>   | <b>0.0164</b>                 |
| <b>ANKRD34A</b> | <b>3.462</b>  | <b>1.479</b>  | <b>0.120</b>   | <b>0.024</b>                  |
| <b>ANKRD35</b>  | <b>4.108</b>  | <b>1.576</b>  | <b>0.145</b>   | <b>0.0128</b>                 |
| <b>LIX1L</b>    | <b>2.847</b>  | <b>1.205</b>  | <b>0.122</b>   | <b>0.0231</b>                 |
| <b>RBM8A</b>    | <b>3.282</b>  | <b>1.236</b>  | <b>0.150</b>   | <b>0.0113</b>                 |
| <b>GNRHR2</b>   | <b>3.145</b>  | <b>1.332</b>  | <b>0.122</b>   | <b>0.0235</b>                 |
| <b>PEX11B</b>   | <b>3.434</b>  | <b>1.294</b>  | <b>0.150</b>   | <b>0.0114</b>                 |
| <b>ITGA10</b>   | <b>3.871</b>  | <b>1.500</b>  | <b>0.143</b>   | <b>0.0134</b>                 |
| <b>NUDT17</b>   | <b>4.617</b>  | <b>1.977</b>  | <b>0.120</b>   | <b>0.025</b>                  |
| <b>RNF115</b>   | <b>2.446</b>  | <b>1.056</b>  | <b>0.118</b>   | <b>0.0260</b>                 |
| <b>CD160</b>    | <b>3.480</b>  | <b>1.362</b>  | <b>0.140</b>   | <b>0.0145</b>                 |
| <b>PDZK1</b>    | <b>4.019</b>  | <b>0.663</b>  | <b>0.479</b>   | <b>3.82 × 10<sup>-7</sup></b> |
| <b>GPR89</b>    | <b>3.744</b>  | <b>0.654</b>  | <b>0.451</b>   | <b>1.14 × 10<sup>-6</sup></b> |
| <b>HYDIN</b>    | <b>2.9969</b> | <b>0.8220</b> | <b>0.2494</b>  | <b>0.0008</b>                 |
| <b>PRKAB2</b>   | <b>2.449</b>  | <b>0.425</b>  | <b>0.454</b>   | <b>1.03 × 10<sup>-6</sup></b> |
| <b>PDIA3P</b>   | <b>3.293</b>  | <b>0.607</b>  | <b>0.424</b>   | <b>3.02 × 10<sup>-6</sup></b> |
| <b>FMO5</b>     | <b>2.392</b>  | <b>0.417</b>  | <b>0.452</b>   | <b>1.09 × 10<sup>-6</sup></b> |
| <b>CHD1L</b>    | <b>2.392</b>  | <b>0.454</b>  | <b>0.415</b>   | <b>1.02 × 10<sup>-6</sup></b> |
| <b>BCL9</b>     | <b>2.484</b>  | <b>0.429</b>  | <b>0.456</b>   | <b>9.28 × 10<sup>-7</sup></b> |
| <b>ACP6</b>     | <b>2.733</b>  | <b>0.478</b>  | <b>0.450</b>   | <b>1.17 × 10<sup>-6</sup></b> |
| <b>GJA5</b>     | <b>2.933</b>  | <b>0.517</b>  | <b>0.446</b>   | <b>1.36 × 10<sup>-6</sup></b> |
| <b>GJA8</b>     | <b>2.626</b>  | <b>0.459</b>  | <b>0.450</b>   | <b>1.19 × 10<sup>-6</sup></b> |
| FCGR1C          | -0.209        | 1.803         | 0.000          | 0.909                         |
| SV2A            | 2.309         | 2.426         | 0.022          | 0.347                         |
| BOLA1           | 1.638         | 2.567         | 0.010          | 0.5271                        |
| MTMR11          | 3.206         | 3.434         | 0.021          | 0.3562                        |
| OTUD7B          | 5.271         | 7.468         | 0.012          | 0.4845                        |
| SF3B4           | 1.698         | 2.776         | 0.009          | 0.5442                        |
| VPS45           | 8.014         | 17.182        | 0.005          | 0.6434                        |
| PLEKHO1         | 6.233         | 4.455         | 0.047          | 0.1694                        |
| ANP32E          | 7.231         | 5.843         | 0.037          | 0.2231                        |
| PRPF3           | 7.231         | 7.698         | 0.022          | 0.3532                        |
| C1orf54         | 5.627         | 4.130         | 0.044          | 0.1807                        |
| MRPS21          | 10.401        | 8.408         | 0.037          | 0.2233                        |

Genes with a significant association ( $p \leq 0.05$ ) are in bold. Genes identified as Class I and Class II deletion groups are bracketed. *PDE4DIP* has an asterisk to indicate it encodes the ancestral DUF1220 domain copy.

**Table S6. Correlation of Average aCGH-Based Copy Ratio of Non-DUF1220 Genes in the 1q21.1-1q21.2 Region with FOC Z Score for the Combined Class I and Class II Deletion Groups**

| Gene                  | Beta         | SE           | R <sup>2</sup> | p Value      |
|-----------------------|--------------|--------------|----------------|--------------|
| <i>SRGAP2</i>         | 2.819        | 1.707        | 0.102          | 0.113        |
| <i>PDE4DIP</i>        | 2.273        | 1.198        | 0.131          | 0.070        |
| <i>SEC22B</i>         | 1.529        | 0.982        | 0.092          | 0.132        |
| <i>NOTCH2NL</i>       | 2.046        | 1.038        | 0.139          | 0.060        |
| <i>HFE2</i>           | 1.018        | 0.658        | 0.091          | 0.135        |
| <i>TXNIP</i>          | 1.006        | 0.662        | 0.088          | 0.141        |
| <i>POLR3GL</i>        | 0.997        | 0.684        | 0.081          | 0.158        |
| <i>ANKRD34A</i>       | 1.328        | 0.923        | 0.079          | 0.163        |
| <i>ANKRD35</i>        | 1.403        | 0.922        | 0.088          | 0.141        |
| <i>LIX1L</i>          | 0.973        | 0.640        | 0.088          | 0.141        |
| <i>RBM8A</i>          | 1.062        | 0.703        | 0.087          | 0.144        |
| <i>GNRHR2</i>         | 1.037        | 0.729        | 0.078          | 0.168        |
| <i>PEX11B</i>         | 1.110        | 0.715        | 0.091          | 0.134        |
| <i>ITGA10</i>         | 1.232        | 0.877        | 0.076          | 0.173        |
| <i>NUDT17</i>         | 1.403        | 1.070        | 1.200          | 0.242        |
| <i>RNF115</i>         | 0.813        | 0.556        | 0.082          | 0.157        |
| <i>CD160</i>          | 1.138        | 0.747        | 0.088          | 0.141        |
| <i>PDZK1</i>          | 1.725        | 1.029        | 0.105          | 0.107        |
| <i>GPR89</i>          | 1.151        | 1.012        | 0.085          | 0.149        |
| <i>HYDIN</i>          | 0.809        | 1.003        | 0.026          | 0.428        |
| <i>PRKAB2</i>         | -1.637       | 3.705        | 0.008          | 0.663        |
| <i>PDIA3P</i>         | -6.233       | 3.052        | 0.148          | 0.052        |
| <i>FMO5</i>           | -2.192       | 4.948        | 0.008          | 0.662        |
| <i>CHD1L</i>          | -2.142       | 3.557        | 0.015          | 0.553        |
| <i>BCL9</i>           | -0.399       | 3.296        | 0.006          | 0.905        |
| <i>ACP6</i>           | -0.556       | 2.370        | 0.002          | 0.817        |
| <i>GJA5</i>           | -0.440       | 1.558        | 0.003          | 0.780        |
| <i>GJA8</i>           | -1.504       | 2.764        | 0.012          | 0.591        |
| <i>FCGR1C</i>         | 0.971        | 0.999        | 0.038          | 0.341        |
| <i>SV2A</i>           | -0.026       | 1.831        | 0.000          | 0.989        |
| <i>BOLA1</i>          | 0.740        | 2.029        | 0.365          | 0.718        |
| <i>MTMR11</i>         | 0.569        | 2.569        | 0.002          | 0.827        |
| <i>OTUD7B</i>         | 0.787        | 5.306        | 0.001          | 0.883        |
| <i>SF3B4</i>          | 1.209        | 2.007        | 0.015          | 0.553        |
| <i>VPS45</i>          | 5.289        | 9.023        | 0.014          | 0.563        |
| <i>PLEKHO1</i>        | 3.174        | 3.496        | 0.033          | 0.373        |
| <i>ANP32E</i>         | 0.942        | 4.051        | 0.002          | 0.818        |
| <i>PRPF3</i>          | 4.604        | 5.890        | 0.025          | 0.442        |
| <b><i>C1orf54</i></b> | <b>4.846</b> | <b>2.251</b> | <b>0.162</b>   | <b>0.042</b> |
| <i>MRPS21</i>         | 5.921        | 6.526        | 0.033          | 0.373        |

Significant ( $p \leq 0.05$ ) associations are shown in bold, and beta is the slope of a fit line.

**Table S7. aCGH-Predicted Correlation of DUF1220 Clade Copy Number versus Residual Gray Matter for the Nondisease Population**

| Clade       | Beta         | SE           | p Value       |
|-------------|--------------|--------------|---------------|
| <b>CON1</b> | <b>0.052</b> | <b>0.023</b> | <b>0.0246</b> |
| <b>CON2</b> | <b>0.042</b> | <b>0.019</b> | <b>0.0334</b> |
| CON3        | 0.019        | 0.020        | 0.3307        |
| HLS1        | 0.001        | 0.030        | 0.9753        |
| HLS2        | 0.017        | 0.035        | 0.6315        |
| HLS3        | 0.014        | 0.035        | 0.6881        |

Significant ( $p \leq 0.05$ ) associations are shown in bold. Beta is the difference in mean copy ratio between high and low gray matter volume groups.

**Table S8. Correlation of Average aCGH-Based Copy Ratio of Non-DUF1220 Genes in the 1q21.1-1q21.2 Region with Residual Gray Matter Groups for the Nondisease Population**

| Gene            | Beta          | SE           | p Value      |
|-----------------|---------------|--------------|--------------|
| SRGAP2          | -0.022        | 0.018        | 0.238        |
| <b>PDE4DIP*</b> | <b>0.021</b>  | <b>0.010</b> | <b>0.044</b> |
| <b>SEC22B</b>   | <b>0.018</b>  | <b>0.009</b> | <b>0.045</b> |
| II NOTCH2NL     | 0.050         | 0.032        | 0.127        |
| HFE2            | -0.017        | 0.019        | 0.369        |
| TXNIP           | -0.009        | 0.011        | 0.446        |
| POLR3           | -0.014        | 0.015        | 0.351        |
| ANKRD34         | -0.051        | 0.427        | 0.233        |
| ANKRD35         | -0.030        | 0.020        | 0.131        |
| LIX1L           | -0.010        | 0.008        | 0.182        |
| RBM8A           | -0.021        | 0.026        | 0.424        |
| GNRHR2          | -0.021        | 0.013        | 0.108        |
| PEX11B          | -0.016        | 0.018        | 0.381        |
| ITGA10          | -0.035        | 0.029        | 0.229        |
| <b>NUDT17</b>   | <b>-0.037</b> | <b>0.017</b> | <b>0.034</b> |
| RNF115          | 0.002         | 0.009        | 0.846        |
| CD160           | -0.010        | 0.013        | 0.452        |
| I PDZK1         | -0.011        | 0.008        | 0.218        |
| GPR89           | 0.006         | 0.005        | 0.298        |
| HYDIN           | -0.063        | 0.127        | 0.623        |
| PRKAB2          | -0.006        | 0.005        | 0.266        |
| PDIA3P          | 0.002         | 0.016        | 0.885        |
| FMO5            | -0.002        | 0.008        | 0.782        |
| CHD1L           | -0.003        | 0.005        | 0.554        |
| BCL9            | -0.011        | 0.007        | 0.135        |
| ACP6            | -0.016        | 0.012        | 0.185        |
| GJA5            | -0.038        | 0.023        | 0.104        |
| GJA8            | -0.014        | 0.014        | 0.319        |
| FCGR1           | -0.005        | 0.056        | 0.936        |
| <b>SV2A</b>     | <b>-0.067</b> | <b>0.033</b> | <b>0.048</b> |
| BOLA1           | -0.054        | 0.030        | 0.072        |
| MTMR11          | -0.031        | 0.024        | 0.201        |
| OTUD7B          | -0.010        | 0.007        | 0.148        |
| <b>SF3B4</b>    | <b>-0.056</b> | <b>0.022</b> | <b>0.012</b> |
| VPS45           | 0.001         | 0.007        | 0.856        |
| PLEKHO1         | -0.021        | 0.022        | 0.329        |
| ANP32E          | -0.016        | 0.012        | 0.163        |
| PRPF3           | -0.002        | 0.009        | 0.832        |
| C1orf54         | 0.001         | 0.015        | 0.927        |
| MRPS21          | -0.009        | 0.009        | 0.358        |

aCGH-predicted correlation of 1q21.1 gene copy number versus FOC Z score for nondisease populations is reported. Significant ( $p \leq 0.05$ ) associations are shown in bold.

**Table S9. Brain Size and Copy Number of DUF1220 Domains and 1q21 Genes in Multiple Species**

|                  | <b>Human</b>   | <b>Chimp</b> | <b>Orangutan</b> | <b>Macaque</b> | <b>Marmoset</b> |
|------------------|----------------|--------------|------------------|----------------|-----------------|
| <b>Brain (g)</b> | 1,350          | 380          | 390              | 88             | 7               |
| Copy #           |                |              |                  |                |                 |
| <i>DUF1220</i>   | 242(272)       | 105(125)     | 70(92)           | 13(35)         | 20(31)          |
| <i>SRGAP2</i>    | 2 <sup>*</sup> | 0            | 0                | 0              | 0               |
| <i>PDE4DIP</i>   | 3              | 3            | 4                | 1              | 1               |
| <i>SEC22B</i>    | 1              | 1            | 1                | 1              | 1               |
| <i>NOTCH2NL</i>  | 1              | 1            | 1                | 1              | 1               |
| <i>HFE2</i>      | 1              | 1            | 1                | 1              | 1               |
| <i>TXNIP</i>     | 1              | 1            | 1                | 1              | 1               |
| <i>POLR3</i>     | 2              | 2            | 2                | 2              | 2               |
| <i>ANKRD34</i>   | 1              | 1            | 1                | 1              | 1               |
| <i>ANKRD35</i>   | 1              | 1            | 1                | 1              | 1               |
| <i>LIX1L</i>     | 1              | 1            | 1                | 1              | 1               |
| <i>RBM8A</i>     | 1              | 1            | 1                | 1              | 1               |
| <i>GNRHR2</i>    | 1              | 1            | 1                | 1              | 1               |
| <i>PEX11B</i>    | 1              | 1            | 1                | 1              | 1               |
| <i>ITGA10</i>    | 1              | 1            | 1                | 1              | 1               |
| <i>NUDT17</i>    | 1              | 1            | 1                | 1              | 1               |
| <i>RNF115</i>    | 1              | 1            | 1                | 1              | 1               |
| <i>CD160</i>     | 1              | 1            | 1                | 1              | 1               |
| <i>PDZK1</i>     | 3              | 1            | 1                | 1              | 1               |
| <i>GPR89</i>     | 3              | 1            | 1                | 1              | 1               |
| <i>HYDIN</i>     | 1              | 0            | 0                | 0              | 0               |
| <i>PRKAB2</i>    | 1              | 1            | 1                | 1              | 1               |
| <i>PDIA3P</i>    | 1              | 1            | 1                | 1              | 1               |
| <i>FMO5</i>      | 1              | 1            | 1                | 1              | 1               |
| <i>CHD1L</i>     | 1              | 1            | 1                | 1              | 1               |
| <i>BCL9</i>      | 1              | 1            | 1                | 1              | 1               |
| <i>ACP6</i>      | 1              | 1            | 1                | 1              | 1               |
| <i>GJA5</i>      | 1              | 1            | 1                | 1              | 1               |
| <i>GJA8</i>      | 1              | 1            | 1                | 1              | 1               |
| <i>FCGR1</i>     | 2              | 1            | 1                | 1              | 1               |
| <i>SV2A</i>      | 1              | 1            | 1                | 1              | 1               |
| <i>BOLA1</i>     | 1              | 1            | 1                | 1              | 1               |
| <i>MTMR11</i>    | 1              | 1            | 1                | 1              | 1               |
| <i>OTUD7B</i>    | 1              | 1            | 1                | 1              | 0               |
| <i>SF3B4</i>     | 1              | 1            | 1                | 1              | 1               |
| <i>VPS45</i>     | 1              | 1            | 1                | 1              | 1               |
| <i>PLEKHO1</i>   | 1              | 1            | 1                | 1              | 1               |
| <i>ANP32E</i>    | 1              | 1            | 1                | 1              | 1               |
| <i>PRPF3</i>     | 1              | 1            | 1                | 1              | 1               |
| <i>C1orf54</i>   | 1              | 1            | 1                | 1              | 1               |
| <i>MRPS21</i>    | 1              | 1            | 1                | 1              | 1               |
| <i>CA14</i>      | 1              | 1            | 1                | 1              | 1               |
| <i>C1orf51</i>   | 1              | 1            | 1                | 1              | 1               |
| <i>APH1A</i>     | 1              | 1            | 1                | 1              | 1               |

II

I



DUF1220 copy number in the 1q21 region is shown, with total DUF1220 genome counts listed in parenthesis. Genes that are in the Class I and Class II deletion and duplication regions identified by Brunetti-Pierri et al 2008 and Mefford et al 2008 are bracketed. \*According to Dennis et al, 2012, two partial copies of SRGAP2 exist in the 1q21.1-1q21.2 region, although the current genome build (hg19) reports only 1 copy.

## Supplementary References

1. Autism Genome Project Consortium. (2007). Mapping autism risk loci using genetic linkage and chromosomal rearrangements. *Nature Genet* 39, 319-328.
2. Brunetti-Pierri, N., Berg, J.S., Scaglia, F., Belmont, J., Bacino, C.A., Sahoo, T., Lalani, S.R., Graham, B., Lee, B., Shinawi, M. *et al.* (2008). Recurrent reciprocal 1q21.1-1q21.2 deletions and duplications associated with microcephaly or macrocephaly and developmental and behavioral abnormalities. *Nature Genet* 40, 1466-1471.
3. Christiansen, J., Dyck, J.D., Elyas, B.G., Lilley, M., Bamforth, J.S., Hicks, M., Sprysak, K.A., Tomaszewski, R., Haase, S.M., Vicen-Wyhony, L.M. *et al.* (2004). Chromosome 1q21.1 contiguous gene deletion is associated with congenital heart disease. *Circ Res* 94, 1401-1402.
4. Dennis, M.Y., Nuttle, X., Sudmant, P.H., Antonacci, F., Graves, T.A., Nefedov, M., Rosenfeld, J.A., Sajjadian, S., Malig, M., Kotkiewicz, H. *et al.* (2012). Evolution of Human-Specific Neural SRGAP2 Genes by Incomplete Segmental Duplication. *Cell* 149, 912-922.
5. Diskin, S.J., Hou, C., Glessner, J.T., Attiyeh, E.F., Laudenslager, M., Bosse, K., Cole, K., Mossé, Y.P., Wood, A., Lynch, J.E. *et al.* (2009). Copy number variation at 1q21.1 associated with neuroblastoma. *Nature* 459, 987-991.
6. Green, R.E., Krause, J., Briggs, A.W., Maricic, T., Stenzel, U., Kircher, M., Patterson, N., Li, H., Zhai, W., Fritz, M. H-Y., *et al.* (2010). A Draft Sequence of the Neandertal Genome. *Science* 7: 328 (5979), 710-722.
7. Greenway, S.C., Pereira, A.C., Lin, J.C., DePalma, S.R., Israel, S.J., Mesquita, S.M., Ergul, E., Conta, J.H., Korn, J.M., McCarroll, S.A. *et al.* (2009). De novo copy number variants identify new genes and loci in isolated sporadic tetralogy of Fallot. *Nat Genet* 41, 931-935.
8. Grozeva, D., Conrad, D.F., Barnes, C.P., Hurles, M., Owen, M.J., O'Donovan, M.C., Craddock, N., Kirov, G., WTCCC. (2012). Epub 2011. Independent estimation of the frequency of rare CNVs in the UK population confirms their role in schizophrenia. *Schizophr Res.* 135, (1-3):1-7.
9. Houeijeh, A., Andrieux, J., Saugier-veber, P., David, A., Goldenberg, A., Bonneau, D., Fouassier, M., Journal, H., Martinovic, J., Escande, F., Devisme, L., Bisiaux, S., Chaffiotte, C., Baux, M., Kerckaert, J.P., Holder-Espinasse, M., Manouvrier-Hanu, S. *Eur J Med Genet.* (2011) Sep-Oct; 54,(5):e471-7. doi: 10.1016/j.ejmg.2011.05.001. Epub 2011 May 13.
10. Holder-Espinasse, M., Manouvrier-Hanu, S. (2011). Thrombocytopenia-absent radius (TAR) syndrome: A clinical genetic series of 14 further cases. Impact of the associated 1q21.1 deletion on the genetic counseling. *Eur J Med Genet* 54, e471-477.

11. Ikeda, M., Aleksic, B., Kirov, G., Kinoshita, Y., Yamanouchi, Y., Kitajima, T., Kawashima, K., Okochi, T., Kishi, T., Zaharieva, I. *et al.* (2010). Copy number variation in schizophrenia in the Japanese population. *Biol Psychiatry* 67, 283-286.
12. International Schizophrenia Consortium. (2008). Rare chromosomal deletions and duplications increase risk of schizophrenia. *Nature* 455,178-179.
13. Jaillard, S., Drunat, S., Bendavid, C., Aboura, A., Etcheverry, A., Journal, H., Delahaye, A., Pasquier, L., Bonneau, D., Toutain, A. *et al.* (2010). Identification of gene copy number variations in patients with mental retardation using array-CGH: Novel syndromes in a large French series. *Eur J Med Genet* 53, 66-75.
14. Klopocki, E., Schulze, H., Strauss, G., Ott, C.E., Hall, J., Trotier, F., Fleischhauer, S., Greenhalgh, L., Newbury-Ecob, R.A., Neumann, L.M. *et al.* (2007). Complex inheritance pattern resembling autosomal recessive inheritance involving a microdeletion in thrombocytopenia-absent radius syndrome. *Am J Hum Genet* 80, 232-240.
15. de Kovel, C.G., Trucks, H., Helbig, I., Mefford, H.C., Baker, C., Leu, C., Kluck, C., Muhle, H., von Spiczak, S., Ostertag, P. *et al.* (2010). Recurrent microdeletions at 15q11.2 and 16p13.11 predispose to idiopathic generalized epilepsies. *Brain* 133, 23-32.
16. Ledig, S., Schippert, C., Strick, R., Beckmann, M.W., Oppelt, P.G., Wieacker, P. (2011). Recurrent aberrations identified by array-CGH in patients with Mayer-Rokitansky-Küster-Hauser syndrome. *Fertil Steril* 95, 1589-1594.
17. Levinson, D.F., Duan, J., Oh, S., Wang, K., Sanders, A.R., Shi, J., Zhang, N., Mowry, B.J., Olincy, A., Amin, F. *et al.* (2011). Copy number variants in schizophrenia: confirmation of five previous findings and new evidence for 3q29 microdeletions and VIPR2 duplications. *Am J Psychiatry* 168, 302-316.
18. Mefford, H.C., Sharp, A.J., Baker, C., Itsara, A., Jiang, Z., Buysse, K., Huang, S., Maloney, V.K., Crolla, J.A., Baralle, D. *et al.* (2008). Recurrent rearrangements of chromosome 1q21.1-1q21.2 and variable pediatric phenotypes. *N Engl J Med* 359, 1685-1699.
19. Pinto, D., Pagnamenta, A.T., Klei, L., Anney, R., Merico, D., Regan, R., Conroy, J., Magalhaes, T.R., Correia, C., Abrahams, B.S. *et al.* (2010). Functional impact of global rare copy number variation in autism spectrum disorders. *Nature* 466, 368-372.
20. Stefansson, H., Rujescu, D., Cichon, S., Pietiläinen, O.P., Ingason, A., Steinberg, S., Fossdal, R., Sigurdsson, E., Sigmundsson, T., Buizer-Voskamp, J.E. *et al.* (2008). Large recurrent microdeletions associated with schizophrenia. *Nature* 455, 232-236.
21. Vandepoele, K., Andries, V., Van Roy, N., Staes, K., Vandesompele, J., Laureys, G., De Smet, E., Berx, G., Speleman, F., van Roy, F. (2008). A constitutional translocation t(1;17)(p36.2;q11.2) in a neuroblastoma patient disrupts the human NBPF1 and ACCN1 genes. *PLoS One* 3, e2207.
22. Velinov, M., Dolzhanskaya, N.. (2010). Clavicular pseudoarthrosis, anomalous coronary artery and extra crease of the fifth finger-previously unreported features in individuals with class II 1q21.1 microdeletions. *Eur J Med Genet* 53, 213-216.

23. Vu, T.H., Coccaro, E.F., Eichler, E.E., Girirajan, S. (2011). Genomic architecture of aggression: Rare copy number variants in intermittent explosive disorder. *Am J Med Genet B Neuropsychiatr Genet* 156, 808-816.
24. Walsh, T., McClellan, J.M., McCarthy, S.E., Addington, A.M., Pierce, S.B., Cooper, G.M., Nord, A.S., Kusenda, M., Malhotra, D., Bhandari, A., et al. (2008). Rare structural variants disrupt multiple genes in neurodevelopmental pathways in schizophrenia. *Science* 320, 539-543.
25. Weber, S., Landwehr, C., Renkert, M., Hoischen, A., Wühl, E., Denecke, J., Radlwimmer, B., Haffner, D., Schaefer, F., Weber, R.G. (2011). Mapping candidate regions and genes for congenital anomalies of the kidneys and urinary tract (CAKUT) by array-based comparative genomic hybridization. *Nephrol Dial Transplant* 26, 136-143.
26. Xu, B., Roos, J.L., Levy, S., van Rensburg, E.J., Gogos, J.A., Karayiorgou, M. (2008). Strong association of de novo copy number mutations with sporadic schizophrenia. *Nature Genet* 40, 880-885.
